# Supplementary material for: Screening Analysis of Platelet miRNA Profile Revealed miR-142-3p as a Potential Biomarker in Modeling the Risk of Acute Coronary Syndrome
Source: MDPI journal article supplement (doi:10.3390/cells10123526), 2021-12-14
Supplement: s1 [file s1]

**Supplementary Figure S3.** Heatmap with Gene Ontology: Biological Functions analysis. Numbers in rows presents number of genes associated with particular function.

| <b>Biological Function</b>                                                  | <b>Cluster 1</b> | <b>Cluster 2</b> |
|-----------------------------------------------------------------------------|------------------|------------------|
| <i>signal transduction</i>                                                  | 102              | 47               |
| <i>positive regulation of transcription from RNA polymerase II promoter</i> | 67               | 36               |
| <i>positive regulation of GTPase activity</i>                               | 53               | 7                |
| <i>positive regulation of cell migration</i>                                | 40               | 33               |
| <i>response to drug</i>                                                     | 35               | 17               |
| <i>extracellular matrix organization</i>                                    | 33               | 40               |
| <i>aging</i>                                                                | 29               | 31               |
| <i>protein phosphorylation</i>                                              | 28               | 42               |
| <i>negative regulation of gene expression</i>                               | 24               | 0                |
| <i>phosphatidylinositol phosphorylation</i>                                 | 23               | 6                |
| <i>positive regulation of smooth muscle cell proliferation</i>              | 22               | 5                |
| <i>positive regulation of ERK1 and ERK2 cascade</i>                         | 22               | 4                |
| <i>MAPK cascade</i>                                                         | 22               | 4                |
| <i>response to hypoxia</i>                                                  | 19               | 3                |
| <i>activation of MAPK activity</i>                                          | 19               | 0                |
| <i>cerebral cortex development</i>                                          | 18               | 17               |
| <i>regulation of phosphatidylinositol 3-kinase signaling</i>                | 18               | 4                |
| <i>platelet activation</i>                                                  | 16               | 15               |
| <i>collagen catabolic process</i>                                           | 15               | 26               |
| <i>phosphatidylinositol-mediated signaling</i>                              | 15               | 3                |
| <i>positive regulation of phospholipase C activity</i>                      | 15               | 2                |
| <i>peptidyl-tyrosine phosphorylation</i>                                    | 14               | 3                |
| <i>positive regulation of positive chemotaxis</i>                           | 14               | 3                |
| <i>positive regulation of nitric oxide biosynthetic process</i>             | 13               | 6                |
| <i>cell adhesion</i>                                                        | 13               | 0                |
| <i>protein stabilization</i>                                                | 12               | 6                |
| <i>chemotaxis</i>                                                           | 12               | 0                |
| <i>response to cold</i>                                                     | 11               | 18               |
| <i>positive regulation of MAP kinase activity</i>                           | 11               | 9                |

*positive regulation of cell proliferation*  
*cell adhesion mediated by integrin*  
*cellular response to estradiol stimulus*  
*nervous system development*  
*positive regulation of gene expression*  
*positive regulation of protein complex assembly*  
*leukocyte chemotaxis*  
*phosphatidylinositol-3-phosphate biosynthetic process*  
*positive regulation of protein kinase B signaling*  
*cell-matrix adhesion*  
*temperature homeostasis*  
*cellular response to insulin-like growth factor stimulus*  
*sphingolipid biosynthetic process*  
*insulin-like growth factor receptor signaling pathway*  
*G-protein coupled acetylcholine receptor signaling pathway*  
*positive regulation of protein phosphorylation*  
*positive regulation of angiogenesis*  
*positive regulation of developmental growth*  
*release of sequestered calcium ion into cytosol*  
*positive regulation of peptidyl-tyrosine phosphorylation*  
*positive regulation of cell adhesion*  
*response to muscle activity*  
*negative regulation of protein phosphorylation*  
*integrin-mediated signaling pathway*  
*positive regulation of leukocyte migration*  
*cellular glucose homeostasis*  
*skeletal system development*  
*response to superoxide*  
*fatty acid oxidation*  
*regulation of immunoglobulin secretion*  
*glutamate receptor signaling pathway*  
*regulation of smooth muscle contraction*

|    |    |
|----|----|
| 11 | 5  |
| 11 | 2  |
| 10 | 2  |
| 10 | 0  |
| 10 | 0  |
| 9  | 2  |
| 9  | 0  |
| 9  | 0  |
| 9  | 0  |
| 9  | 0  |
| 8  | 12 |
| 8  | 2  |
| 8  | 0  |
| 8  | 0  |
| 8  | 0  |
| 7  | 12 |
| 7  | 3  |
| 6  | 6  |
| 6  | 3  |
| 6  | 3  |
| 6  | 2  |
| 6  | 2  |
| 6  | 0  |
| 6  | 0  |
| 6  | 0  |
| 6  | 0  |
| 4  | 8  |
| 4  | 8  |
| 4  | 2  |
| 4  | 0  |
| 4  | 0  |
| 4  | 0  |

|                                                                                                  |   |    |
|--------------------------------------------------------------------------------------------------|---|----|
| <i>cellular response to amino acid stimulus</i>                                                  | 3 | 12 |
| <i>positive regulation of cysteine-type endopeptidase activity involved in apoptotic process</i> | 3 | 0  |
| <i>positive regulation of endothelial cell migration</i>                                         | 3 | 0  |
| <i>positive regulation of cell division</i>                                                      | 3 | 0  |
| <i>aorta smooth muscle tissue morphogenesis</i>                                                  | 2 | 10 |
| <i>positive regulation of glycolytic process</i>                                                 | 2 | 4  |
| <i>smooth muscle contraction</i>                                                                 | 2 | 4  |
| <i>positive regulation of lipophagy</i>                                                          | 2 | 0  |
| <i>inositol phosphate biosynthetic process</i>                                                   | 2 | 0  |
| <i>regulation of phosphatidylinositol 3-kinase activity</i>                                      | 2 | 0  |
| <i>regulation of establishment of endothelial barrier</i>                                        | 2 | 0  |
| <i>positive regulation of protein kinase C signaling</i>                                         | 2 | 0  |
| <i>tube formation</i>                                                                            | 2 | 0  |
| <i>phosphatidylinositol metabolic process</i>                                                    | 2 | 0  |
| <i>sleep</i>                                                                                     | 2 | 0  |
| <i>cell migration involved in sprouting angiogenesis</i>                                         | 2 | 0  |
| <i>positive regulation of blood vessel endothelial cell migration</i>                            | 2 | 0  |
| <i>positive regulation of focal adhesion assembly</i>                                            | 2 | 0  |

**Supplementary Figure S4.** Heatmap with Gene Ontology: Cellular Compartment analysis. Numbers in rows presents number of genes associated with particular function.

| <b>Cellular Compartment</b>                   | <b>Cluster 1</b> | <b>Cluster 2</b> |
|-----------------------------------------------|------------------|------------------|
| <i>cytoplasm</i>                              | 72               | 46               |
| <i>membrane</i>                               | 71               | 13               |
| <i>extracellular region</i>                   | 58               | 68               |
| <i>extracellular space</i>                    | 51               | 43               |
| <i>cytosol</i>                                | 48               | 0                |
| <i>plasma membrane</i>                        | 43               | 16               |
| <i>Golgi apparatus</i>                        | 42               | 34               |
| <i>proteinaceous extracellular matrix</i>     | 23               | 36               |
| <i>collagen trimer</i>                        | 21               | 38               |
| <i>extracellular matrix</i>                   | 20               | 14               |
| <i>external side of plasma membrane</i>       | 20               | 0                |
| <i>receptor complex</i>                       | 16               | 27               |
| <i>cytoskeleton</i>                           | 15               | 4                |
| <i>intracellular</i>                          | 15               | 0                |
| <i>membrane raft</i>                          | 14               | 3                |
| <i>nuclear euchromatin</i>                    | 12               | 2                |
| <i>endoplasmic reticulum lumen</i>            | 11               | 40               |
| <i>integral component of plasma membrane</i>  | 10               | 9                |
| <i>extrinsic component of membrane</i>        | 9                | 0                |
| <i>early endosome</i>                         | 8                | 16               |
| <i>endoplasmic reticulum</i>                  | 8                | 0                |
| <i>focal adhesion</i>                         | 5                | 0                |
| <i>lamellipodium</i>                          | 4                | 8                |
| <i>integrin complex</i>                       | 4                | 0                |
| <i>filopodium</i>                             | 3                | 6                |
| <i>cell-cell junction</i>                     | 3                | 3                |
| <i>intrinsic component of plasma membrane</i> | 2                | 2                |
| <i>CD40 receptor complex</i>                  | 2                | 0                |
| <i>collagen type IV trimer</i>                | 0                | 8                |
| <i>organelle membrane</i>                     | 0                | 6                |
| <i>collagen type VI trimer</i>                | 0                | 4                |
| <i>endosome membrane</i>                      | 0                | 3                |
